# Supplementary material for: Differentiation and classification of bacterial endotoxins based on surface enhanced Raman scattering and advanced machine learning
Source: Royal Society of Chemistry journal article supplement (doi:10.1039/d2nr01277d), 2022-01-01
Supplement: d2nr01277d1.pdf [file d2nr01277d1.pdf]

## Electronic Supplementary Information

### Differentiation and classification of bacterial endotoxins based on surface enhanced Raman scattering and advanced machine learning

Yanjun Yang <sup>a\*</sup>, Beibei Xu <sup>b</sup>, James Haverstick <sup>c</sup>, Nabil Ibtehaz <sup>d</sup>, Artur Muszyński <sup>e</sup>,

Xianyan Chen <sup>b</sup>, Muhammad E. H. Chowdhury <sup>f</sup>, Susu M. Zughailer <sup>g\*</sup>, Yiping Zhao <sup>c\*</sup>

<sup>a</sup> School of Electrical and Computer Engineering, College of Engineering, The University of Georgia, Athens, GA 30602, USA

<sup>b</sup> Department of Statistics, The University of Georgia, Athens, GA 30602, USA

<sup>c</sup> Department of Physics and Astronomy, The University of Georgia, Athens, GA 30602, USA

<sup>d</sup> Department of Computer Science, Purdue University, West Lafayette, IN 47907, USA

<sup>e</sup> Complex Carbohydrate Research Center, University of Georgia, Athens, GA 30602, USA

<sup>f</sup> Department of Electrical Engineering, College of Engineering, Qatar University, Doha, Qatar, PO. Box 2713

<sup>g</sup> Department of Basic Medical Sciences, College of Medicine, QU Health, Qatar University, Doha, Qatar, PO. Box 2713

## S1. LPSs and controls used in this study

**Table S1:** Characterization of LPS structures used in this study.

| LPS source                                       | Lipid A backbone and acylation pattern <sup>!</sup>                                                                                      | Polysaccharide (core-O-antigen type) <sup>#</sup>            | Biological activity <sup>*</sup>                  |
|--------------------------------------------------|------------------------------------------------------------------------------------------------------------------------------------------|--------------------------------------------------------------|---------------------------------------------------|
| <i>E. coli</i> -EH100 (Ra, rough LPS)            | (GlcN) <sub>2</sub> , P <sub>2</sub> , hexa-acyl (14:0(3-OH) <sub>3</sub> , 14:0, 12:0)                                                  | Ra-type core oligosaccharide, no O-antigen                   | Active                                            |
| <i>E. coli</i> -J5 (Rc, rough LPS)               | (GlcN) <sub>2</sub> , P <sub>2</sub> , hexa-acyl (14:0(3-OH) <sub>3</sub> , 14:0, 12:0)                                                  | Rc-type core oligosaccharide, no O-antigen                   | Active                                            |
| <i>E. coli</i> -O11:B4 Smooth LPS                | (GlcN) <sub>2</sub> , P <sub>2</sub> , hexa-acyl (14:0(3-OH) <sub>3</sub> , 14:0, 12:0)                                                  | core oligosaccharide- O-antigen polymer smooth LPS           | Active                                            |
| <i>E. coli</i> -O128:B12 Smooth LPS              | (GlcN) <sub>2</sub> , P <sub>2</sub> , hexa-acyl (14:0(3-OH) <sub>3</sub> , 14:0, 12:0)                                                  | core-O-antigen polymer;                                      | Active                                            |
| <i>F. tularensis</i> LVS Smooth LPS              | (GlcN) <sub>2</sub> , P, GalN, tetra-acyl (18:0(3-OH) <sub>3</sub> , 16:0) or (16:0(3-OH) <sub>3</sub> , 18:0)                           | core oligosaccharide -O-antigen polymer                      | Inactive (very weak agonist Does not induce TLR4) |
| <i>H. pylori</i> GU2 Smooth LPS                  | (GlcN) <sub>2</sub> , PEtN, tetra-acyl; (18:0(3-OH) <sub>3</sub> , 16:0)                                                                 | core oligosaccharide -O-antigen polymer                      | Inactive                                          |
| <i>M. catarrhalis</i> LOS                        | (GlcN) <sub>2</sub> , P <sub>2</sub> , PEtN, hepta-acyl (12:0(3-OH) <sub>4</sub> , 12:0, 10:0)                                           | core oligosaccharide, no O-antigen /lipooligosaccharide(LOS) | Active                                            |
| <i>P. aeruginosa</i> Smooth LPS                  | (GlcN) <sub>2</sub> , P <sub>2</sub> , hexa/hepta-acyl (12:0(3-OH) <sub>3</sub> , 10:0 (3-OH) <sub>1 or 2</sub> , 12:0, 16:0)            | core oligosaccharide -O-antigen polymer                      | Active                                            |
| <i>S. minnesota</i> Re595 Rough LPS              | (GlcN) <sub>2</sub> , P <sub>2</sub> , hexa-acyl (14:0(3-OH) <sub>3</sub> , 14:0, 12:0)                                                  | Re- type truncated core oligosaccharide /]                   | Active                                            |
| <i>S. enterica</i> serovar Typhimurium Rough LPS | (GlcN) <sub>2</sub> , P <sub>2</sub> , hexa-acyl (14:0(3-OH) <sub>3</sub> , 14:0, 12:0)                                                  | core oligosaccharide -O-antigen polymer /                    | Active                                            |
| <i>Sinorhizobium meliloti</i> Rm1021 Smooth LPS  | (GlcN) <sub>2</sub> , P <sub>2</sub> , penta-acyl e.g (14:0(3-OH) <sub>2</sub> , 18:0(3-OH) <sub>2</sub> , 28:0(27-OH)/ 28:0(27-βOme C4) | core oligosaccharide -O-antigen polymer                      | Inactive                                          |

Table Foot notes

!: The lipid A backbone and number and length of lipid A fatty acyl chains.

#: Complex structure of saccharide chain as poly or oligo or just truncated to core saccharides.

\*: Immunostimulatory potency or ability to induce immune responses in macrophages

## **LPSs**

In general, these 11 kinds of LPSs are representative of the most common bacteria that cause disease in humans. Bacterial pathogens such as various strains of *E. coli* and *Salmonella* can cause gastroenteritis or foodborne diseases as well as other infections such as urinary tract (UTI), sepsis, and nosocomial or healthcare acquired infections. *Pseudomonas aeruginosa* can cause wide range of infections in human such as lung infections, UTI, sepsis, skin, and other nosocomial infections. *H. pylori* is the common cause of stomach infection or gastritis which affect half of the global population. *Fransicella tularensis* is a serious bio-threat pathogen that causes tularemia which could be fatal in humans. All these LPSs represent gram negative bacterial pathogens that are often evolving into antibiotic resistant strains which render it difficult to treat.<sup>1-4</sup>

## **Non LPS controls**

In this study, we tested cell wall biomarkers from Gram positive bacterial pathogens devoid of LPS such as *Staphylococcus aureus* that causes serious wide range of infections in humans including food poisoning, sepsis, soft tissue, joint and bone infections as well as nosocomial infections. Antibiotic resistant *S. aureus* known as MRSA is considered an urgent threat to human health as this pathogen spreads in community and healthcare setting increasing disease burden and treatment failure.<sup>4, 5</sup> *Bacillus subtilis* was also used in this study as is a common cause of food poisoning or foodborne infection.<sup>6</sup>

*Staphylococcus aureus* peptidoglycan (PGN) is a ~1000-fold less biologically active in inducing innate immune responses compared to LPS. *B. subtilis* lipoteccioic acid (LTA) is similar to PGN in biological activity. Chitin is a linear aminopolyssaccharide polymer.

## S2. SERS substrate and collected SERS spectra.

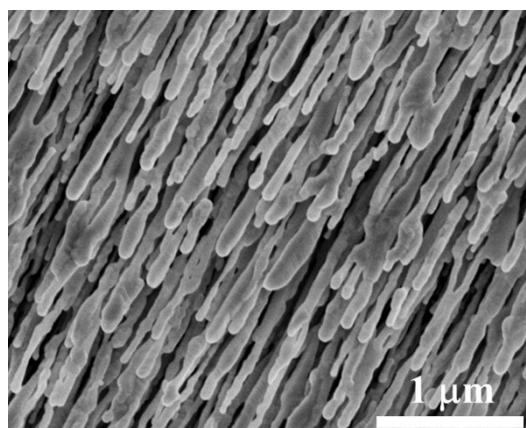

**Fig. S1** SEM image of AgNR array SERS substrate.

**Table S2.** The number of SERS spectra taken and the average spectral correlation coefficient using different data pre-processing methods.

|                            |                                               | Spectra number | Correlation coefficient |                    |                    |
|----------------------------|-----------------------------------------------|----------------|-------------------------|--------------------|--------------------|
| Baseline correction method | Our method                                    |                | Raw data                | WiRE               |                    |
| 1                          | <i>E. coli</i> -EH100                         | 390            | 0.986                   | 0.978              | 0.899              |
| 2                          | <i>E. coli</i> -J5                            | 409            | 0.984                   | 0.966              | 0.941              |
| 3                          | <i>E. coli</i> -O11:B4                        | 392            | 0.954                   | 0.982              | 0.959              |
| 4                          | <i>E. coli</i> -O128:B12                      | 394            | 0.994                   | 0.980              | 0.956              |
| 5                          | <i>F. tularensis</i> LVS                      | 415            | 0.993                   | 0.990              | 0.986              |
| 6                          | <i>H. pylori</i> GU2                          | 440            | 0.993                   | 0.988              | 0.987              |
| 7                          | <i>M. catarrhalis</i>                         | 367            | 0.987                   | 0.985              | 0.833              |
| 8                          | <i>P. aeruginosa</i>                          | 393            | 0.942                   | 0.942              | 0.808              |
| 9                          | <i>S. meliloti</i> Rm1021                     | 419            | 0.900                   | 0.937              | 0.871              |
| 10                         | <i>S. minnesota</i> Re595                     | 427            | 0.981                   | 0.969              | 0.914              |
| 11                         | <i>S. enterica</i> serovar <i>Typhimurium</i> | 396            | 0.984                   | 0.976              | 0.968              |
| 12                         | <i>S. aureus</i> (LTA)                        | 436            | 0.985                   | 0.975              | 0.951              |
| 13                         | <i>B. subtilis</i> (PGN)                      | 338            | 0.984                   | 0.979              | 0.959              |
| 14                         | Chitin                                        | 408            | 0.990                   | 0.984              | 0.966              |
| <b>Average</b>             |                                               | <b>402</b>     | <b>0.98 ± 0.03</b>      | <b>0.97 ± 0.02</b> | <b>0.93 ± 0.06</b> |

### S3. Baseline correction method and parameter boundaries

**Table S3.** The boundaries for the parameters of baseline fitting function.

| Definition                                  | Parameter  | Boundary                     |
|---------------------------------------------|------------|------------------------------|
| amplitude of the Gaussian function          | $A$        | $0.3 \leq A \leq 0.5$        |
| center of the Gaussian peak                 | $\nu_g$    | $75 \leq \nu_g \leq 300$     |
| standard deviation of the Gaussian function | $\sigma_g$ | $800 \leq \nu_g \leq 1800$   |
| area of the Lorentzian function             | $L$        | $100 \leq L \leq 400$        |
| center of the Lorentzian peak               | $\nu_l$    | $125 \leq \nu_l \leq 150$    |
| width of the Lorentzian peak                | $\sigma_l$ | $400 \leq \sigma_l \leq 500$ |
| “ground” level of the SERS spectrum         | $I_0$      | $-0.1 \leq I_0 \leq 0.1$     |

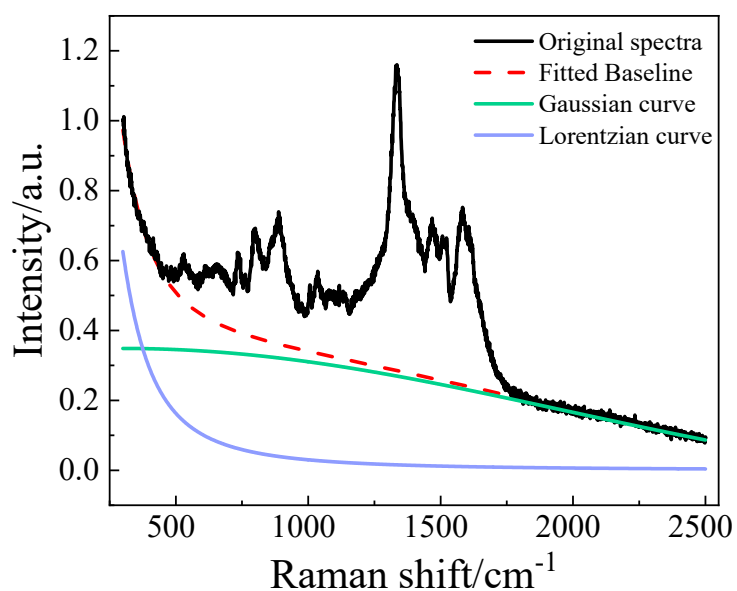

**Fig. S2** Baseline correction: a typical raw SERS spectrum of *F. tularensis* LVS (solid black curve), a fitted baseline (dashed red curve), and the corresponding Gaussian curve (solid blue curve) and Lorentzian curve (solid green curve) in the baseline fitting.

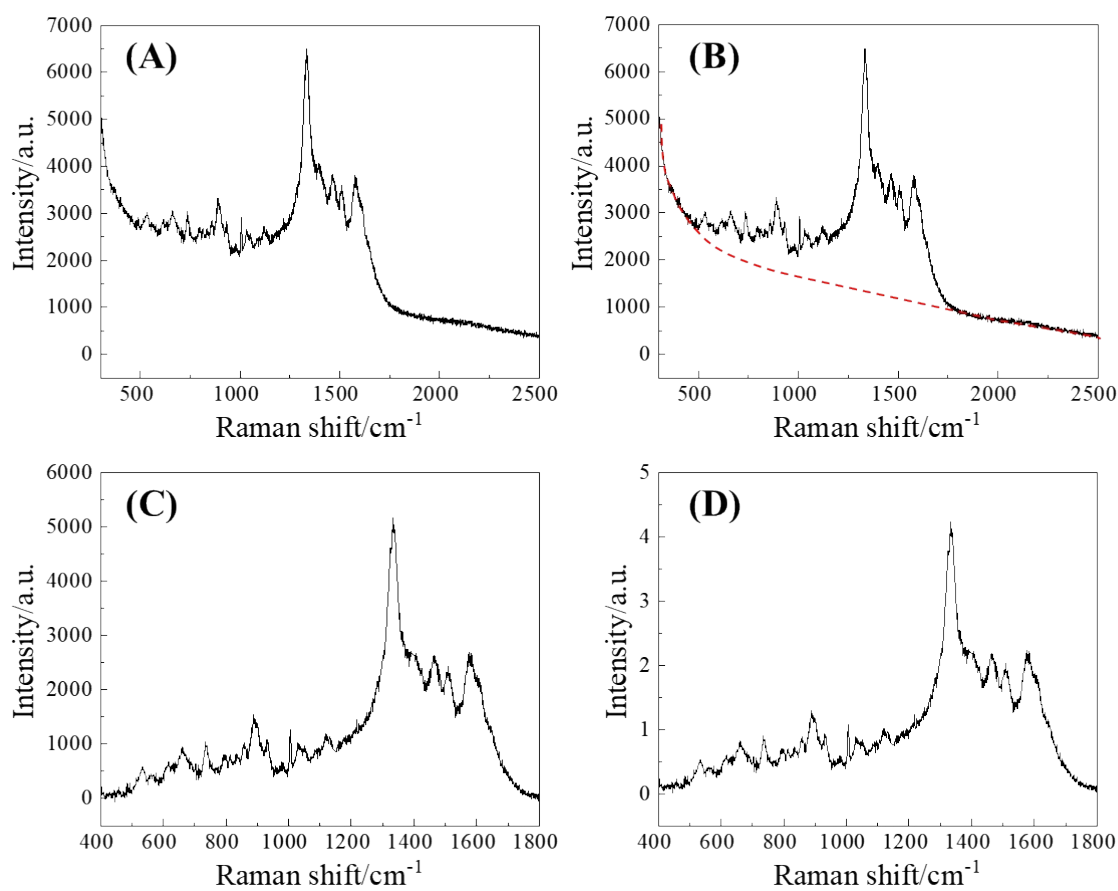

**Fig. S3** (A) Typical raw SERS spectrum of *F. tularensis* LVS. (B) Baseline corrected by the Eq.1 (red dash line). (C) Baseline corrected spectrum. (D) Normalize the spectrum by the mean of the spectrum.

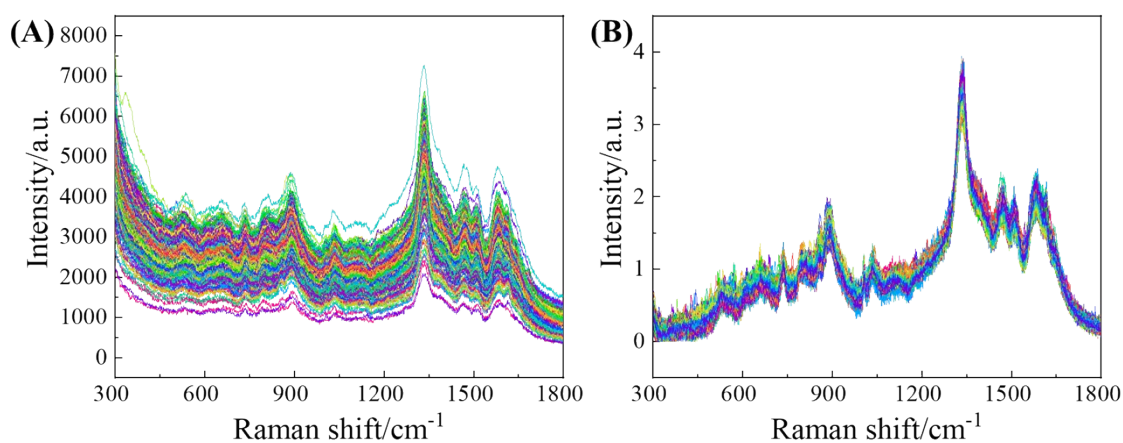

**Fig. S4** (A) Original SERS spectra of *F. tularensis* LVS. (B) SERS spectra of *F. tularensis* LVS after pre-processing.

#### S4. The effect of different spectra pre-processing on MLAs

**Table S4.** Comparison of the results of the SVM trained models different with kernel functions.

| Accuracy          |               |
|-------------------|---------------|
| <b>Linear</b>     | 0.9998±0.0005 |
| <b>Polynomial</b> | 0.975±0.003   |
| <b>Sigmoid</b>    | 0.931±0.009   |
| <b>RBF</b>        | 0.999±0.001   |

**Table S5.** The accuracies obtained from different machine learning models for different data pre-processing methods.

| Models          | Data pre-processing methods |                 |                             |                 |
|-----------------|-----------------------------|-----------------|-----------------------------|-----------------|
|                 | Our method                  | Raw data        | Raw data with normalization | WiRE correction |
| <b>RamanNet</b> | 1.0000 ± 0.0000             | 0.9980 ± 0.0003 | 0.9992 ± 0.0003             | 0.997 ± 0.002   |
| <b>SVM</b>      | 0.9998 ± 0.0005             | 0.994 ± 0.003   | 0.995 ± 0.004               | 0.995 ± 0.002   |
| <b>RF</b>       | 0.995 ± 0.001               | 0.973 ± 0.006   | 0.981 ± 0.002               | 0.975 ± 0.006   |
| <b>KNN</b>      | 0.992 ± 0.003               | 0.979 ± 0.008   | 0.978 ± 0.006               | 0.953 ± 0.006   |
| <b>LDA</b>      | 0.998 ± 0.001               | 0.988 ± 0.002   | 0.990 ± 0.002               | 0.965 ± 0.007   |
| <b>PLS-DA</b>   | 0.98 ± 0.02                 | 0.85 ± 0.02     | 0.924 ± 0.004               | 0.78 ± 0.02     |

Based on the overall spectral features of SERS spectra we obtained, a simple baseline correction method using Gaussian and Lorentzian function fitting was developed. **Table S2** summarized the average correlation coefficient between each individual spectrum and the average spectrum by using different baseline removal methods. A commercial WiRE baseline correction method based on polynomial fitting gave the average correlation coefficient ranging from 0.899 to 0.987, with an average coefficient of  $0.93 \pm 0.06$ , even worse than that ( $0.97 \pm 0.02$ ) of the original spectra set. Our baseline correction method shows the highest average correlation coefficient,  $0.98 \pm 0.03$ . In addition, the feature space from different data set is projected into a 2 dimensional-map using t-Distributed Stochastic Neighbor Embedding (tSNE).<sup>7</sup> Most clusters in the tSNE plot derived from PCA feature space from raw data (**Fig. S5A**) have curve shape and are overlapped due to the large variation of baselines. After the spectra were only normalized by area, the clusters are still overlapped (**Fig. S5C**). With WiRE baseline correction, only four clusters can be well separated, and other clusters are still overlapped. However, our baseline correction method shows that most clusters are free from overlaps and distributed properly with minimizing intraclass distance and maximizing interclass distance (**Fig. S5D**). This ensures better distinction among the classes, which increases classification performance as shown in **Table S5**. Compared to WiRE baseline correction, the accuracies of our baseline correction method increased significantly from 0.78 to 0.98 for PLS-DA model, and from 0.995 to 0.9998 for SVM model. Moreover, as shown in RamanNet embedding space, RamanNet model enables most clusters distribute properly without overlap and maximizing interclass distance, even for raw spectra (**Fig. S5B**), raw

spectra with normalization (**Fig. S5D**), and WiRE corrected spectra (**Fig. S5F**), only several spectra were misclassified. Using our baseline correction method, all clusters are well separated with minimizing intraclass distance and maximizing interclass distance (**Fig. S5H**), which can achieve a 100% accuracy. Although the accuracy increase is apparently insignificant for RamanNet model using different data pre-processing, we hope that our baseline correction method could facilitate the machine learning model to achieve higher accuracy for more complex data sets measured from real patient samples.

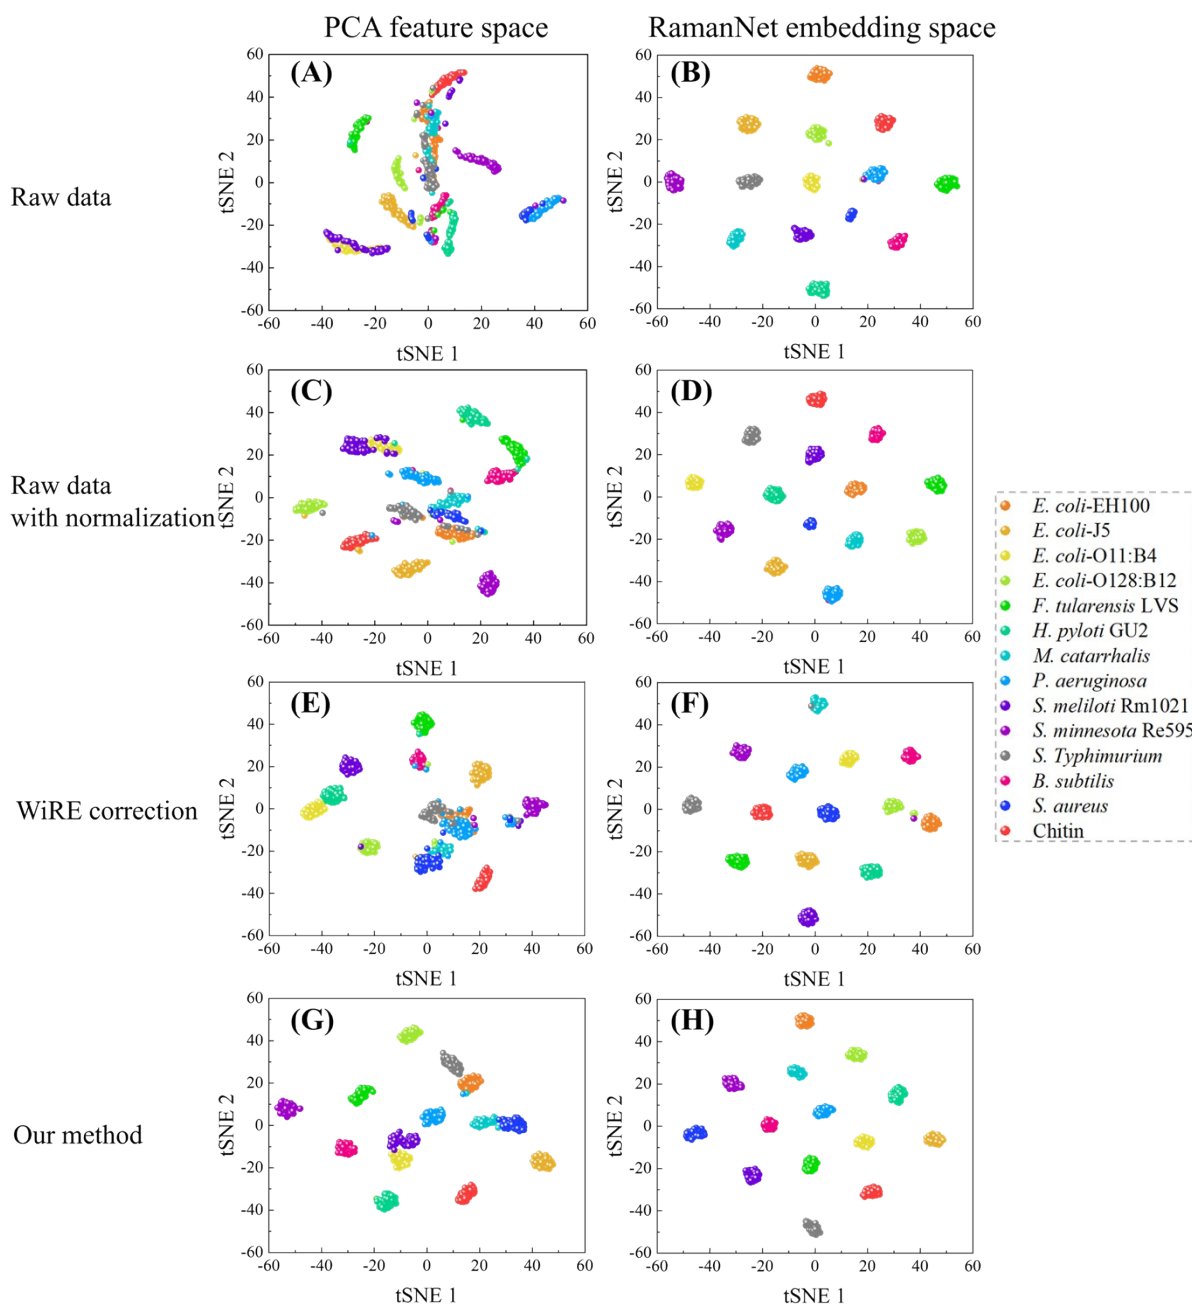

**Fig. S5** The 256-dimensional feature space is projected into a 2 dimensional-map using tSNE based on SERS spectra from different data pre-processing methods. PCA feature space: (A) raw data, (C) raw data with normalization, (E) WiRE correction, (G) our method. RamanNet embedding space: (B) raw data, (D) raw data with normalization, (F) WiRE correction, (H) our method.



## S5. SERS peak assignments

**Table S6.** SERS peak assignment for bacterial endotoxin structures<sup>8-13</sup>.

| Endotoxin                | Peak (cm <sup>-1</sup> ) | Peak assignment                                                                                                         | Component                         |
|--------------------------|--------------------------|-------------------------------------------------------------------------------------------------------------------------|-----------------------------------|
| <b>LPSs</b>              |                          |                                                                                                                         |                                   |
| <i>E. coli</i> -EH100    | 668                      | $\delta$ (C-O-C) (glycosidic linkage), $\delta$ (C-C-C), $\delta$ (C-O-H)                                               | O-Antigen                         |
|                          | 809                      | $\delta$ (C-C-H), $\delta$ (C-O-H)                                                                                      | O-Antigen                         |
|                          | 852                      | $\nu$ (C-O-C)                                                                                                           | saccharides (1,4 glycosidic link) |
|                          | 920                      | $\delta$ (C-C-H), $\delta$ (C-O-H)                                                                                      | O-Antigen                         |
|                          | 1003                     | $\nu$ (C-O), $\nu$ (C-C)                                                                                                | O-Antigen                         |
|                          | 1043                     | $\nu$ (C-O), $\nu$ (C-C)                                                                                                | O-Antigen                         |
|                          | 1142                     | $\delta$ (C-H)                                                                                                          | Lipid A                           |
|                          | 1340                     | $\delta$ (C-H)                                                                                                          | Lipid A                           |
|                          | 1381                     | $\delta$ (CH <sub>3</sub> ), $\nu$ (C-N)                                                                                | O-Antigen                         |
|                          | 1445                     | Scissoring CH <sub>2</sub> /CH <sub>3</sub> , $\delta$ (C-O-C) (glycosidic linkage), $\delta$ (C-C-C), $\delta$ (C-O-H) | Lipid A                           |
| 1615                     | $\nu$ (C-C) $\nu$ (C-O)  | Lipid A                                                                                                                 |                                   |
| <i>E. coli</i> -J5       | 672                      | $\delta$ (C-O-C)                                                                                                        | fatty acid                        |
|                          | 895                      | $\delta$ (C-C-H), $\delta$ (C-O-H)                                                                                      | O-Antigen                         |
|                          | 1005                     | $\nu$ (C-O), $\nu$ (C-C)                                                                                                | O-Antigen                         |
|                          | 1337                     | $\delta$ (C-H)                                                                                                          | Lipid A                           |
|                          | 1381                     | $\delta$ (CH <sub>3</sub> ), $\nu$ (C-N)                                                                                | O-Antigen                         |
|                          | 1613                     | $\nu$ (C-C) $\nu$ (C-O)                                                                                                 | Lipid A                           |
| <i>E. coli</i> -O11:B4   | 731                      | $\beta$ (C-O-C)                                                                                                         | carbohydrates                     |
|                          | 792                      | $\nu$ (C-O)                                                                                                             | ring                              |
|                          | 856                      | $\delta$ (C-C-H), $\delta$ (C-O-H)                                                                                      | O-Antigen                         |
|                          | 1005                     | $\nu$ (C-C) $\nu$ (C-O)                                                                                                 | O-Antigen                         |
|                          | 1033                     | $\nu$ (C-C) $\nu$ (C-O)                                                                                                 | O-Antigen                         |
|                          | 1099                     | $\nu$ (C-N)                                                                                                             | O-Antigen                         |
|                          | 1336                     | $\delta$ (C-H)                                                                                                          | Lipid A                           |
|                          | 1467                     | $\delta$ (C-O-C) (glycosidic linkage), $\delta$ (C-C-C), $\delta$ (C-O-H)                                               | O-Antigen                         |
|                          | 1508                     | $\nu$ (C-N), $\delta$ (CH <sub>3</sub> )                                                                                | O-Antigen                         |
|                          | 1583                     | $\nu$ (C-O)                                                                                                             | O-Antigen                         |
| 1618                     | $\nu$ (C-C) $\nu$ (C-O)  | Lipid A                                                                                                                 |                                   |
| <i>E. coli</i> -O128:B12 | 672                      | $\beta$ (C-O-C)                                                                                                         | carbohydrates                     |
|                          | 731                      | $\beta$ (C-O-C)                                                                                                         | carbohydrates                     |
|                          | 790                      | $\nu$ (C-O)                                                                                                             | ring                              |
|                          | 911                      | $\delta$ (C-C-H), $\delta$ (C-O-H)                                                                                      | O-Antigen                         |
|                          | 1006                     | $\nu$ (C-C) $\nu$ (C-O)                                                                                                 | O-Antigen                         |
|                          | 1028                     | $\nu$ (C-O)                                                                                                             | carbohydrates                     |
|                          | 1085                     | $\nu$ (C-O)                                                                                                             | Lipid A                           |
|                          | 1331                     | $\beta$ (C-H)                                                                                                           | Lipid A                           |
|                          | 1381                     | $\delta$ (CH <sub>3</sub> ), $\nu$ (C-N)                                                                                | O-Antigen                         |
|                          | 1463                     | $\delta$ (C-O-C) (glycosidic linkage), $\delta$ (C-C-C), $\delta$ (C-O-H)                                               | O-Antigen                         |

|                             |                          |                                                                                           |               |
|-----------------------------|--------------------------|-------------------------------------------------------------------------------------------|---------------|
|                             | 1580                     | $\nu$ (C-O)                                                                               | O-Antigen     |
|                             | 1615                     | $\nu$ (C-O), $\nu$ (C-C)                                                                  | Lipid A       |
| <i>F. tularensis</i><br>LVS | 531                      | $\delta$ (C-O-C) (glycosidic linkage)                                                     | O-Antigen     |
|                             | 662                      | $\delta$ (C-O-C) (glycosidic linkage), $\delta$ (C-C-C), $\delta$ (C-O-H)                 | O-Antigen     |
|                             | 736                      | Symmetric $\nu$ (CH <sub>3</sub> ) <sub>3</sub>                                           | Lipid A       |
|                             | 794                      | $\nu$ (C-O)                                                                               | ring          |
|                             | 891                      | $\delta$ (C-C-H), $\delta$ (C-O-H)                                                        | O-Antigen     |
|                             | 1006                     | $\nu$ (C-O), $\nu$ (C-C)                                                                  | O-Antigen     |
|                             | 1036                     | $\nu$ (C-O), $\nu$ (C-C)                                                                  | O-Antigen     |
|                             | 1337                     | $\delta$ (C-H)                                                                            | Lipid A       |
|                             | 1469                     | $\delta$ (C-O-C) (glycosidic linkage), $\delta$ (C-C-C), $\delta$ (C-O-H)                 | O-Antigen     |
|                             | 1508                     | $\nu$ (C-N), $\delta$ (CH <sub>3</sub> )                                                  | O-Antigen     |
|                             | 1583                     | $\nu$ (C-O)                                                                               | O-Antigen     |
| <i>H. pylori</i> GU2        | 548                      | $\delta$ (C-O-C) (glycosidic linkage)                                                     | O-Antigen     |
|                             | 656                      | $\delta$ (C-O-C) (glycosidic linkage), $\delta$ (C-C-C), $\delta$ (C-O-H)                 | O-Antigen     |
|                             | 735                      | Symmetric $\nu$ (CH <sub>3</sub> ) <sub>3</sub>                                           | Lipid A       |
|                             | 795                      | $\nu$ (C-O)                                                                               | ring          |
|                             | 892                      | $\delta$ (C-C-H), $\delta$ (C-O-H)                                                        | O-Antigen     |
|                             | 1034                     | $\nu$ (C-O), $\nu$ (C-C)                                                                  | O-Antigen     |
|                             | 1333                     | $\delta$ (C-H)                                                                            | Lipid A       |
|                             | 1467                     | $\delta$ (C-O-C) (glycosidic linkage), $\delta$ (C-C-C), $\delta$ (C-O-H)                 | O-Antigen     |
|                             | 1508                     | $\nu$ (C-N), $\delta$ (CH <sub>3</sub> )                                                  | O-Antigen     |
| 1578                        | $\nu$ (C-O), N-H bending | O-Antigen                                                                                 |               |
| <i>M. catarrhalis</i>       | 560                      | $\beta$ (CH <sub>2</sub> )                                                                | ring          |
|                             | 665                      | $\delta$ (C-O-C) (glycosidic linkage), $\delta$ (C-C-C), $\delta$ (C-O-H)                 | O-Antigen     |
|                             | 759                      | Symmetric $\nu$ (CH <sub>3</sub> ) <sub>3</sub>                                           | Lipid A       |
|                             | 890                      | $\delta$ (C-C-H), $\delta$ (C-O-H)                                                        | O-Antigen     |
|                             | 1006                     | $\nu$ (C-O), $\nu$ (C-C)                                                                  | O-Antigen     |
|                             | 1037                     | $\nu$ (C-O), $\nu$ (C-C)                                                                  | O-Antigen     |
|                             | 1135                     | $\delta$ (C-H)                                                                            | Lipid A       |
|                             | 1174                     | $\delta$ (C-O-C) (glycosidic linkage)                                                     | Lipid A       |
|                             | 1335                     | $\delta$ (C-H)                                                                            | Lipid A       |
|                             | 1459                     | $\alpha$ (CH <sub>2</sub> /CH <sub>3</sub> ), $\beta$ (CH <sub>2</sub> /CH <sub>3</sub> ) | Lipid A       |
|                             | 1616                     | $\nu$ (C-O), $\nu$ (C-C)                                                                  | Lipid A       |
| <i>P. aeruginosa</i>        | 542                      | $\delta$ (C-O-C) (glycosidic linkage)                                                     | O-Antigen     |
|                             | 648                      | $\delta$ (C-O-C) (glycosidic linkage), $\delta$ (C-C-C), $\delta$ (C-O-H)                 | O-Antigen     |
|                             | 734                      | $\beta$ (C-O-C)                                                                           | carbohydrates |
|                             | 789                      | $\nu$ (C-O)                                                                               | ring          |
|                             | 857                      | $\delta$ (C-C-H), $\delta$ (C-O-H)                                                        | O-Antigen     |
|                             | 894                      | $\delta$ (C-C-H), $\delta$ (C-O-H)                                                        | O-Antigen     |
|                             | 1004                     | $\nu$ (C-O), $\nu$ (C-C)                                                                  | O-Antigen     |

|                        |                          |                                                                                                                         |                 |
|------------------------|--------------------------|-------------------------------------------------------------------------------------------------------------------------|-----------------|
|                        | 1047                     | $\nu$ (C-O), $\nu$ (C-C)                                                                                                | O-Antigen       |
|                        | 1079                     | $\nu$ (C-O), $\nu$ (C-C)                                                                                                | O-Antigen       |
|                        | 1141                     | $\delta$ (C-H)                                                                                                          | Lipid A         |
|                        | 1326                     | $\delta$ (C-H), Bending CH <sub>2</sub>                                                                                 | O-Antigen, Core |
|                        | 1381                     | $\delta$ (CH <sub>3</sub> ), $\nu$ (C-N)                                                                                | O-Antigen       |
|                        | 1458                     | Scissoring CH <sub>2</sub> /CH <sub>3</sub> , $\delta$ (C-O-C) (glycosidic linkage), $\delta$ (C-C-C), $\delta$ (C-O-H) | Lipid A         |
|                        | 1617                     | $\nu$ (C-O), $\nu$ (C-C)                                                                                                | Lipid A         |
| <i>S. meliloti</i>     | 568                      | $\beta$ (CH <sub>2</sub> )                                                                                              | ring            |
|                        | 656                      | $\delta$ (C-O-C) (glycosidic linkage), $\delta$ (C-C-C), $\delta$ (C-O-H)                                               | O-Antigen       |
|                        | 732                      | $\beta$ (C-O-C)                                                                                                         | carbohydrates   |
|                        | 791                      | $\nu$ (C-O)                                                                                                             | ring            |
|                        | 863                      | $\delta$ (C-C-H), $\delta$ (C-O-H)                                                                                      | O-Antigen       |
|                        | 894                      | $\delta$ (C-C-H), $\delta$ (C-O-H)                                                                                      | O-Antigen       |
|                        | 1033                     | $\nu$ (C-O), $\nu$ (C-C)                                                                                                | O-Antigen       |
|                        | 1092                     | $\nu$ (C-N)                                                                                                             | O-Antigen       |
|                        | 1270                     | dC-O-C (glycosidic linkage)                                                                                             | Lipid A         |
|                        | 1333                     | $\delta$ (C-H)                                                                                                          | Lipid A         |
|                        | 1479                     | $\delta$ (C-O-C) (glycosidic linkage), $\delta$ (C-C-C), $\delta$ (C-O-H)                                               | O-Antigen       |
|                        | 1586                     | $\nu$ (C-O)                                                                                                             | O-Antigen       |
|                        | 1642                     | $\nu$ (C-O), $\nu$ (C-C)                                                                                                | Lipid A         |
| <i>S. minnesota</i>    | 577                      | $\beta$ (CH <sub>2</sub> )                                                                                              | ring            |
|                        | 668                      | $\delta$ (C-O-C) (glycosidic linkage), $\delta$ (C-C-C), $\delta$ (C-O-H)                                               | O-Antigen       |
|                        | 808                      | $\delta$ (C-C-H), $\delta$ (C-O-H)                                                                                      | O-Antigen       |
|                        | 916                      | $\delta$ (C-C-H), $\delta$ (C-O-H)                                                                                      | O-Antigen       |
|                        | 1042                     | $\nu$ (C-O), $\nu$ (C-C)                                                                                                | O-Antigen       |
|                        | 1139                     | $\delta$ (C-H)                                                                                                          | Lipid A         |
|                        | 1280                     | $\delta$ (C-O-C) (glycosidic linkage)                                                                                   | Lipid A         |
|                        | 1612                     | $\nu$ (C-O), $\nu$ (C-C)                                                                                                | Lipid A         |
| <i>S. typhimurium</i>  | 669                      | $\delta$ (C-O-C) (glycosidic linkage), $\delta$ (C-C-C), $\delta$ (C-O-H)                                               | O-Antigen       |
|                        | 808                      | $\delta$ (C-C-H), $\delta$ (C-O-H)                                                                                      | O-Antigen       |
|                        | 855                      | $\delta$ (C-O-C)                                                                                                        | O-Antigen       |
|                        | 915                      | $\delta$ (C-C-H), $\delta$ (C-O-H)                                                                                      | O-Antigen       |
|                        | 1005                     | $\nu$ (C-O), $\nu$ (C-C)                                                                                                | O-Antigen       |
|                        | 1045                     | $\nu$ (C-O), $\nu$ (C-C)                                                                                                | O-Antigen       |
|                        | 1105                     | $\nu$ (C-O)                                                                                                             | O-Antigen       |
|                        | 1141                     | $\delta$ (C-H)                                                                                                          | Lipid A         |
|                        | 1337                     | $\delta$ (C-H)                                                                                                          | Lipid A         |
|                        | 1381                     | $\delta$ (CH <sub>3</sub> ), $\nu$ (C-N)                                                                                | O-Antigen       |
|                        | 1592                     | $\nu$ (C-O)                                                                                                             | O-Antigen       |
| 1614                   | $\nu$ (C-O), $\nu$ (C-C) | Lipid A                                                                                                                 |                 |
| <b>Control samples</b> |                          |                                                                                                                         |                 |

|                                           |      |                                                                                                                         |                                                                                        |
|-------------------------------------------|------|-------------------------------------------------------------------------------------------------------------------------|----------------------------------------------------------------------------------------|
| PGN from <i>S. aureus</i> <sup>14</sup>   | 541  | $\delta$ (C-O-C) (glycosidic linkage)                                                                                   | N-Acetylglucosamine                                                                    |
|                                           | 734  | $\beta$ (C-O-C)                                                                                                         | carbohydrates                                                                          |
|                                           | 808  | $\delta$ (C-C-H), $\delta$ (C-O-H)                                                                                      | Glycerolphosphate repeating units                                                      |
|                                           | 1039 | $\nu$ (C-O), $\nu$ (C-C)                                                                                                | Glycerolphosphate repeating units                                                      |
|                                           | 1094 | $\nu$ (C-O)                                                                                                             | Glycerolphosphate repeating units                                                      |
|                                           | 1336 | $\delta$ (C-H)                                                                                                          | Glycerolphosphate repeating units                                                      |
|                                           | 1462 | $\delta$ (C-O-C) (glycosidic linkage), $\delta$ (C-C-C), $\delta$ (C-O-H)                                               | N-Acetylglucosamine, Glycerolphosphate repeating units                                 |
|                                           | 1584 | $\nu$ (C-O)                                                                                                             | carbohydrates                                                                          |
|                                           | 1615 | $\nu$ (C-O), $\nu$ (C-C)                                                                                                | Glycerolphosphate repeating units                                                      |
| LTA from <i>B. subtilis</i> <sup>15</sup> | 669  | $\delta$ (C-O-C) (glycosidic linkage), $\delta$ (C-C-C), $\delta$ (C-O-H)                                               | N-Acetylglucosamine and N-Acetylmuramic acid linked to pentapeptides                   |
|                                           | 860  | $\delta$ (C-C-H), $\delta$ (C-O-H)                                                                                      | pentapeptides                                                                          |
|                                           | 891  | $\delta$ (C-C-H), $\delta$ (C-O-H)                                                                                      | pentapeptides                                                                          |
|                                           | 930  | $\delta$ (C-C-H), $\delta$ (C-O-H)                                                                                      | pentapeptides                                                                          |
|                                           | 1005 | $\nu$ (C-O), $\nu$ (C-C)                                                                                                | pentaglycyl segment                                                                    |
|                                           | 1136 | $\delta$ (C-H)                                                                                                          | pentapeptides bridge link                                                              |
|                                           | 1334 | $\delta$ (C-H)                                                                                                          | pentapeptides bridge link                                                              |
|                                           | 1453 | Scissoring CH <sub>2</sub> /CH <sub>3</sub> , $\delta$ (C-O-C) (glycosidic linkage), $\delta$ (C-C-C), $\delta$ (C-O-H) | N-Acetylglucosamine and N-Acetylmuramic acid linked to pentapeptides bridge link       |
|                                           | 1508 | $\delta$ (CH <sub>3</sub> )                                                                                             | carbohydrates                                                                          |
| Chitin <sup>16</sup>                      | 555  | $\beta$ (CH <sub>2</sub> )                                                                                              | ring                                                                                   |
|                                           | 775  | $\nu$ (C-O)                                                                                                             | ring                                                                                   |
|                                           | 892  | $\delta$ (C-C-H), $\delta$ (C-O-H)                                                                                      | Polysaccharide linear polymer of $\beta$ -1,4-linked N-Acetylglucosamine (GlcNAc) unit |
|                                           | 930  | $\delta$ (C-C-H), $\delta$ (C-O-H)                                                                                      | Polysaccharide linear polymer of $\beta$ -1,4-linked N-Acetylglucosamine (GlcNAc) unit |
|                                           | 1006 | $\nu$ (C-O), $\nu$ (C-C)                                                                                                | Polysaccharide linear                                                                  |

|  |      |                                                                                                                         |                                                                                          |
|--|------|-------------------------------------------------------------------------------------------------------------------------|------------------------------------------------------------------------------------------|
|  |      |                                                                                                                         | polymer of $\beta$ -1,4-linked N-Acetylglucosamine (GlcNAc) unit                         |
|  | 1043 | $\nu$ (C-O), $\nu$ (C-C)                                                                                                | Polysaccharide linear polymer I of $\beta$ -1,4-linked N-Acetylglucosamine (GlcNAc) unit |
|  | 1134 | $\delta$ (C-H)                                                                                                          | Lipid anchor                                                                             |
|  | 1304 | $\delta$ (C-H), $\beta$ (CH <sub>2</sub> )                                                                              | Polysaccharide linear polymer of $\beta$ -1,4-linked N-Acetylglucosamine (GlcNAc) unit   |
|  | 1449 | Scissoring CH <sub>2</sub> /CH <sub>3</sub> , $\delta$ (C-O-C) (glycosidic linkage), $\delta$ (C-C-C), $\delta$ (C-O-H) | Polysaccharide linear polymer of $\beta$ -1,4-linked N-Acetylglucosamine (GlcNAc) unit   |
|  | 1614 | $\nu$ (C-O), $\nu$ (C-C)                                                                                                | Lipid anchor                                                                             |

$\beta$ , bending;  $\delta$ , deformation;  $\tau$ , twisting;  $\nu$ , stretching.

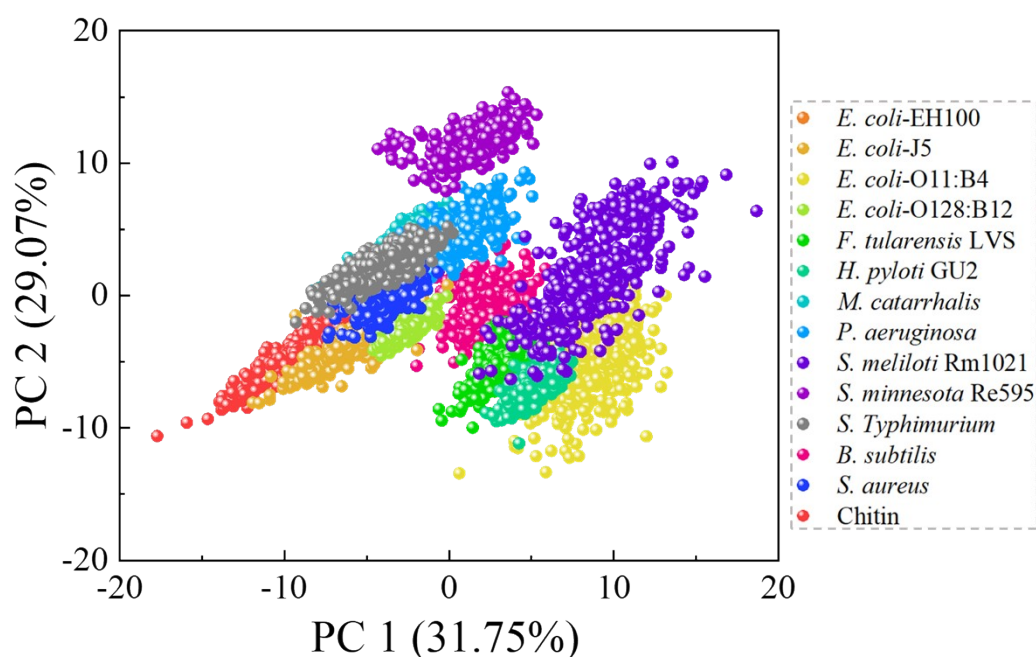

**Fig. S6** The 2D PCA plot for SERS spectra of eleven bacterial endotoxin samples and three reference samples.

**Table S7.** SERS peak assignment for LPSs.

| SERS peaks | Peak assignment                                                                            | <i>E. coli</i> -EH100 | <i>E. coli</i> -J5 | <i>E. coli</i> -O11:B4 | <i>E. coli</i> -O128:B12 | <i>F. tularensis</i> LVS | <i>H. pylori</i> GU2 | <i>M. catarrhalis</i> | <i>P. aeruginosa</i> | <i>S. meliloti</i> Rm1021 | <i>S. minnesota</i> Re595 | <i>S. typhimurium</i> | PGN from <i>B. subtilis</i> | LTA from <i>S. aureus</i> | Chitin | Number of common peaks |
|------------|--------------------------------------------------------------------------------------------|-----------------------|--------------------|------------------------|--------------------------|--------------------------|----------------------|-----------------------|----------------------|---------------------------|---------------------------|-----------------------|-----------------------------|---------------------------|--------|------------------------|
| 531        | $\delta$ (C-O-C) (glycosidic linkage)                                                      |                       |                    |                        |                          |                          |                      |                       |                      |                           |                           |                       |                             |                           |        | 1                      |
| 542        | $\delta$ (C-O-C) (glycosidic linkage)                                                      |                       |                    |                        |                          |                          |                      |                       |                      |                           |                           |                       |                             |                           |        | 3                      |
| 560        | $\beta$ (CH <sub>2</sub> )                                                                 |                       |                    |                        |                          |                          |                      |                       |                      |                           |                           |                       |                             |                           |        | 2                      |
| 568        | $\beta$ (CH <sub>2</sub> )                                                                 |                       |                    |                        |                          |                          |                      |                       |                      |                           |                           |                       |                             |                           |        | 1                      |
| 577        | $\beta$ (CH <sub>2</sub> )                                                                 |                       |                    |                        |                          |                          |                      |                       |                      |                           |                           |                       |                             |                           |        | 1                      |
| 648        | $\delta$ (C-O-C) (glycosidic linkage), $\delta$ (C-C-C), $\delta$ (C-O-H)                  |                       |                    |                        |                          |                          |                      |                       |                      |                           |                           |                       |                             |                           |        | 1                      |
| 656        | $\delta$ (C-O-C) (glycosidic linkage), $\delta$ (C-C-C), $\delta$ (C-O-H)                  |                       |                    |                        |                          |                          |                      |                       |                      |                           |                           |                       |                             |                           |        | 2                      |
| 669        | $\delta$ (C-O-C) (glycosidic linkage), $\delta$ (C-C-C), $\delta$ (C-O-H), $\beta$ (C-O-C) |                       |                    |                        |                          |                          |                      |                       |                      |                           |                           |                       |                             |                           |        | 8                      |
| 735        | $\beta$ (C-O-C), Symmetric $\nu$ (CH <sub>3</sub> ) <sub>3</sub>                           |                       |                    |                        |                          |                          |                      |                       |                      |                           |                           |                       |                             |                           |        | 7                      |
| 759        | Symmetric $\nu$ (CH <sub>3</sub> ) <sub>3</sub>                                            |                       |                    |                        |                          |                          |                      |                       |                      |                           |                           |                       |                             |                           |        | 1                      |
| 775        | $\nu$ (C-O)                                                                                |                       |                    |                        |                          |                          |                      |                       |                      |                           |                           |                       |                             |                           |        | 1                      |
| 794        | $\nu$ (C-O)                                                                                |                       |                    |                        |                          |                          |                      |                       |                      |                           |                           |                       |                             |                           |        | 6                      |
| 808        | $\delta$ (C-C-H), $\delta$ (C-O-H)                                                         |                       |                    |                        |                          |                          |                      |                       |                      |                           |                           |                       |                             |                           |        | 4                      |
| 852        | $\nu$ (C-O-C)                                                                              |                       |                    |                        |                          |                          |                      |                       |                      |                           |                           |                       |                             |                           |        | 2                      |
| 857        | $\delta$ (C-C-H), $\delta$ (C-O-H)                                                         |                       |                    |                        |                          |                          |                      |                       |                      |                           |                           |                       |                             |                           |        | 4                      |
| 894        | $\delta$ (C-C-H), $\delta$ (C-O-H)                                                         |                       |                    |                        |                          |                          |                      |                       |                      |                           |                           |                       |                             |                           |        | 8                      |
| 917        | $\delta$ (C-C-H), $\delta$ (C-O-H)                                                         |                       |                    |                        |                          |                          |                      |                       |                      |                           |                           |                       |                             |                           |        | 4                      |

|      |                                                                                                                  |  |  |  |  |  |  |  |  |  |  |  |  |  |  |    |
|------|------------------------------------------------------------------------------------------------------------------|--|--|--|--|--|--|--|--|--|--|--|--|--|--|----|
| 1003 | $\nu$ (C-C), $\nu$ (C-O)                                                                                         |  |  |  |  |  |  |  |  |  |  |  |  |  |  | 10 |
| 1033 | $\nu$ (C-C), $\nu$ (C-O)                                                                                         |  |  |  |  |  |  |  |  |  |  |  |  |  |  | 7  |
| 1047 | $\nu$ (C-C), $\nu$ (C-O)                                                                                         |  |  |  |  |  |  |  |  |  |  |  |  |  |  | 5  |
| 1079 | $\nu$ (C-C), $\nu$ (C-O)                                                                                         |  |  |  |  |  |  |  |  |  |  |  |  |  |  | 2  |
| 1095 | $\nu$ (C-N), $\nu$ (C-O)                                                                                         |  |  |  |  |  |  |  |  |  |  |  |  |  |  | 4  |
| 1136 | $\delta$ (C-H)                                                                                                   |  |  |  |  |  |  |  |  |  |  |  |  |  |  | 7  |
| 1174 | $\delta$ (C-O-C) (glycosidic linkage)                                                                            |  |  |  |  |  |  |  |  |  |  |  |  |  |  | 1  |
| 1270 | $\delta$ (C-O-C) (glycosidic linkage)                                                                            |  |  |  |  |  |  |  |  |  |  |  |  |  |  | 2  |
| 1304 | $\delta$ (C-H), Bending $\text{CH}_2$                                                                            |  |  |  |  |  |  |  |  |  |  |  |  |  |  | 1  |
| 1326 | $\delta$ (C-H), Bending $\text{CH}_2$                                                                            |  |  |  |  |  |  |  |  |  |  |  |  |  |  | 1  |
| 1333 | $\delta$ (C-H)                                                                                                   |  |  |  |  |  |  |  |  |  |  |  |  |  |  | 11 |
| 1387 | $\delta$ ( $\text{CH}_3$ ), $\nu$ (C-N)                                                                          |  |  |  |  |  |  |  |  |  |  |  |  |  |  | 6  |
| 1453 | Scissoring $\text{CH}_2/\text{CH}_3$ , $\delta$ (C-O-C) (glycosidic linkage), $\delta$ (C-C-C), $\delta$ (C-O-H) |  |  |  |  |  |  |  |  |  |  |  |  |  |  | 5  |
| 1469 | $\delta$ (C-O-C) (glycosidic linkage), $\delta$ (C-C-C), $\delta$ (C-O-H)                                        |  |  |  |  |  |  |  |  |  |  |  |  |  |  | 6  |
| 1508 | $\nu$ (C-N), $\delta$ ( $\text{CH}_3$ )                                                                          |  |  |  |  |  |  |  |  |  |  |  |  |  |  | 4  |
| 1578 | $\nu$ (C-O), N-H bending                                                                                         |  |  |  |  |  |  |  |  |  |  |  |  |  |  | 1  |
| 1592 | $\nu$ (C-O)                                                                                                      |  |  |  |  |  |  |  |  |  |  |  |  |  |  | 7  |
| 1614 | $\nu$ (C-C) $\nu$ (C-O)                                                                                          |  |  |  |  |  |  |  |  |  |  |  |  |  |  | 11 |
| 1642 | $\nu$ (C-C) $\nu$ (C-O)                                                                                          |  |  |  |  |  |  |  |  |  |  |  |  |  |  | 1  |

## S6. Additional description of confusion matrix

|         | Predicted           |                     |
|---------|---------------------|---------------------|
| Actual  | Label 1             | Label 2             |
| Label 1 | True positive (TP)  | False Negative (FN) |
| Label 2 | False Positive (FP) | True Negative (TN)  |

**Fig. S7** Confusion matrix example.

**Table S8** lists the seven performance measures used to evaluate the ML models. Accuracy calculates the proportion of correct predictions. Precision is the ratio of correct positive predictions to all positive predictions. Recall is the ratio of correct positive predictions to all positive observations. F1-score is the weighted average of Precision and Recall. Micro and Macro averages are two types of average of measures for multi-class setting. Micro average pools the performance over all samples, while macro calculates the measures for each class and average them. For example, Micro Precision pools all TP and FP over all classes and calculate the ratio of correct positive predictions to all positive predictions with pooled TP and FP, while Macro Precision calculates precision for all classes individually and then take the average.



**Table S8.** Equations for accuracy, precision, recall, F1 score.

| <b>Equations</b>       |                                                                                                             |
|------------------------|-------------------------------------------------------------------------------------------------------------|
| <b>Accuracy</b>        | $Accuracy = \frac{TP + TN}{Total}$                                                                          |
| <b>Micro Precision</b> | $Precision_{Micro} = \frac{\sum_{i=1}^N TP_i}{N}$                                                           |
| <b>Macro Precision</b> | $Precision_{Macro} = \frac{1}{N} \sum_{i=1}^N \frac{TP_i}{TP_i + FP_i}$                                     |
| <b>Micro Recall</b>    | $Recall_{Micro} = \frac{\sum_{i=1}^N TP_i}{N}$                                                              |
| <b>Macro Recall</b>    | $Recall_{Macro} = \frac{1}{N} \sum_{i=1}^N \frac{TP_i}{TP_i + FN_i}$                                        |
| <b>Micro F1-score</b>  | $F1_{Micro} = \frac{2 \times Precision_{Micro} \times Recall_{Micro}}{Precision_{Micro} + Recall_{Micro}}$  |
| <b>Macro F1-score</b>  | $F1_{Macro} = \frac{1}{N} \sum_{i=1}^N \frac{2 \times Precision_i \times Recall_i}{Precision_i + Recall_i}$ |

Footnote:  $N = 14$  labels; TP: True Positives; TN: True Negatives; FP: False Positives; FN: False Negatives.

## S7. Additional results from MLAs

**Table S9.** Important features from SVM model.

| Important features (SVM) | Peak assignment                                                           | <i>E. coli</i> -EH100 | <i>E. coli</i> -J5 | <i>E. coli</i> -O11:B4 | <i>E. coli</i> -O128:B12 | <i>F. tularensis</i> LVS | <i>H. pylori</i> GU2 | <i>M. catarrhalis</i> | <i>P. aeruginosa</i> | <i>S. meliloti</i> Rm1021 | <i>S. minnesota</i> Re595 | <i>S. typhimurium</i> | <i>B. subtilis</i> (PGN) | <i>S. aureus</i> (LTA) | Chitin | Number of peaks |
|--------------------------|---------------------------------------------------------------------------|-----------------------|--------------------|------------------------|--------------------------|--------------------------|----------------------|-----------------------|----------------------|---------------------------|---------------------------|-----------------------|--------------------------|------------------------|--------|-----------------|
| 670                      | $\delta$ (C-O-C) (glycosidic linkage), $\delta$ (C-C-C), $\delta$ (C-O-H) |                       |                    |                        |                          |                          |                      |                       |                      |                           |                           |                       |                          |                        |        | 7               |
| 734                      | $\beta$ (C-O-C)                                                           |                       |                    |                        |                          |                          |                      |                       |                      |                           |                           |                       |                          |                        |        | 7               |
| 795                      | $\nu$ (C-O)                                                               |                       |                    |                        |                          |                          |                      |                       |                      |                           |                           |                       |                          |                        |        | 6               |
| 857                      | $\delta$ (C-C-H), $\delta$ (C-O-H)                                        |                       |                    |                        |                          |                          |                      |                       |                      |                           |                           |                       |                          |                        |        | 5               |
| 930                      | $\delta$ (C-C-H), $\delta$ (C-O-H)                                        |                       |                    |                        |                          |                          |                      |                       |                      |                           |                           |                       |                          |                        |        | 2               |
| 1003                     | $\nu$ (C-O), $\nu$ (C-C)                                                  |                       |                    |                        |                          |                          |                      |                       |                      |                           |                           |                       |                          |                        |        | 10              |
| 1048                     | $\nu$ (C-O), $\nu$ (C-C)                                                  |                       |                    |                        |                          |                          |                      |                       |                      |                           |                           |                       |                          |                        |        | 4               |
| 1333                     | $\delta$ (C-H)                                                            |                       |                    |                        |                          |                          |                      |                       |                      |                           |                           |                       |                          |                        |        | 10              |
| 1381                     | $\delta$ (CH <sub>3</sub> ), $\nu$ (CN) <sup>17</sup>                     |                       |                    |                        |                          |                          |                      |                       |                      |                           |                           |                       |                          |                        |        | 7               |
| 1593                     | $\nu$ (C-O)                                                               |                       |                    |                        |                          |                          |                      |                       |                      |                           |                           |                       |                          |                        |        | 2               |
| 1617                     | $\nu$ (C-O), $\nu$ (C-C)                                                  |                       |                    |                        |                          |                          |                      |                       |                      |                           |                           |                       |                          |                        |        | 11              |
| <b>Number of peaks</b>   |                                                                           | 6                     | 4                  | 6                      | 7                        | 4                        | 3                    | 5                     | 6                    | 4                         | 4                         | 8                     | 3                        | 6                      | 5      |                 |

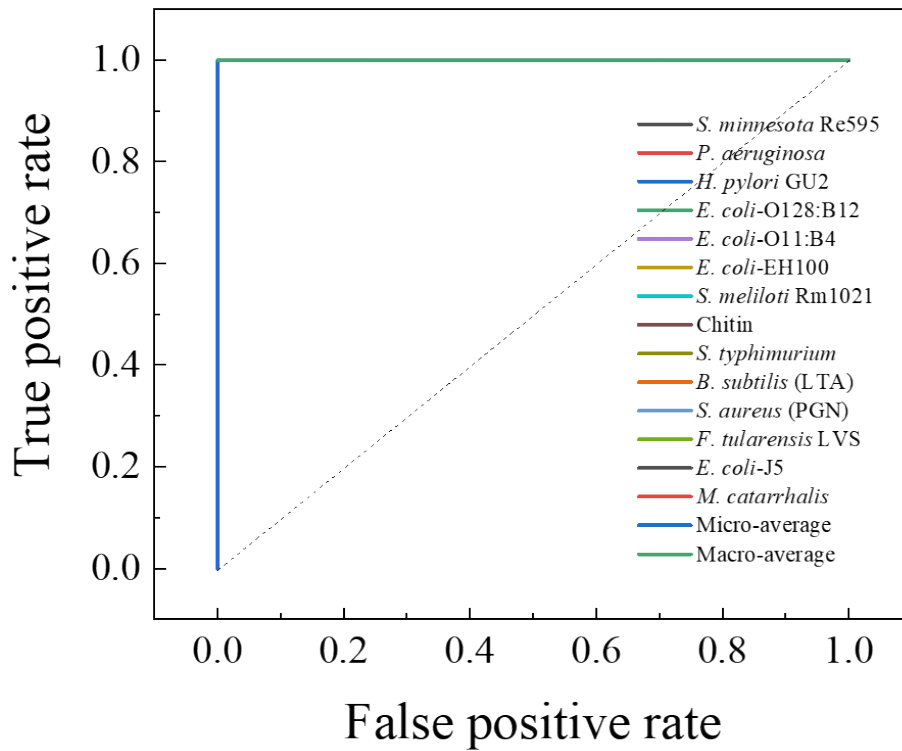

**Fig. S8** The ROC curves using One-vs-Rest scheme for each LPS and Micro- and Macro-average ROC on all LPSs for the SVM classifier.

### S8. Additional results from MLAs for LPS mixtures

**Table S10.** List of LPS mixtures and their biological significance.

|   | Mixture | Number of SERS spectra | Analyte 1                 | Analyte 2                 | Biological significance                                                                                                                                                                                                                                                                                    | Ref    |
|---|---------|------------------------|---------------------------|---------------------------|------------------------------------------------------------------------------------------------------------------------------------------------------------------------------------------------------------------------------------------------------------------------------------------------------------|--------|
| 1 | ES      | 396                    | <i>E. coli</i> -O11:B4    | <i>S. minnesota</i> Re595 | Both pathogens are common cause of food borne infections and harbor biologically active LPS.                                                                                                                                                                                                               | 18, 19 |
| 2 | FH      | 422                    | <i>F. tularensis</i> LVS  | <i>H. pylori</i> GU2      | <i>H. pylori</i> is common cause of gastritis affecting 50% of world population. In contrast, <i>F. tularensis</i> causes tularemia which is rare but serious infection. Both pathogens' LPS structures are biologically inactive and share similarities, yet they cause very different diseases in human. | 20, 21 |
| 3 | EH      | 409                    | <i>E. coli</i> -O11:B4    | <i>H. pylori</i> GU2      | Both pathogens are commonly causing disease in human, but their LPS structures vary greatly.                                                                                                                                                                                                               | 18, 21 |
| 4 | SH      | 423                    | <i>S. minnesota</i> Re595 | <i>H. pylori</i> GU2      | Both pathogens are commonly causing disease in human, but their LPS structures vary greatly.                                                                                                                                                                                                               | 21, 22 |

**Table S11.** The accuracy obtained from different ML models using SERS spectra from single LPSs and mixtures.

| Models          | Accuracy        |
|-----------------|-----------------|
| <b>RamanNet</b> | 1.000 ± 0.000   |
| <b>SVM</b>      | 0.997 ± 0.002   |
| <b>RF</b>       | 0.995 ± 0.002   |
| <b>KNN</b>      | 0.991 ± 0.003   |
| <b>LDA</b>      | 0.9988 ± 0.0008 |
| <b>PLS-DA</b>   | 0.928 ± 0.005   |

**Fig. S9** The confusion matrix of the RamanNet model from SERS spectra of single LPS (11 LPS and 3 control samples) and 4 mixtures. Entries in the matrix represents the percentage of test spectra that are predicted by the SVM model as class (first row) given a ground truth of class (first column); entries along the diagonal represent the accuracies for each class. **(Below)**

| <b>True</b>               | <b>Predicted</b> | <i>E. coli</i> -EH100 | <i>E. coli</i> -J5 | <i>E. coli</i> -O11:B4 | <i>E. coli</i> -O128:B12 | <i>F. tularensis</i> LVS | <i>H. pylori</i> GU2 | <i>M. catarrhalis</i> | <i>P. aeruginosa</i> | <i>S. meliloti</i> Rm1021 | <i>S. minnesota</i> Re595 | <i>S. Typhimurium</i> | <i>S. aureus</i> | <i>B. subtilis</i> | Chitin | ES  | FH  | HE  | HS  |
|---------------------------|------------------|-----------------------|--------------------|------------------------|--------------------------|--------------------------|----------------------|-----------------------|----------------------|---------------------------|---------------------------|-----------------------|------------------|--------------------|--------|-----|-----|-----|-----|
| <i>E. coli</i> -EH100     |                  | 100                   |                    |                        |                          |                          |                      |                       |                      |                           |                           |                       |                  |                    |        |     |     |     |     |
| <i>E. coli</i> -J5        |                  |                       | 100                |                        |                          |                          |                      |                       |                      |                           |                           |                       |                  |                    |        |     |     |     |     |
| <i>E. coli</i> -O11:B4    |                  |                       |                    | 100                    |                          |                          |                      |                       |                      |                           |                           |                       |                  |                    |        |     |     |     |     |
| <i>E. coli</i> -O128:B12  |                  |                       |                    |                        | 100                      |                          |                      |                       |                      |                           |                           |                       |                  |                    |        |     |     |     |     |
| <i>F. tularensis</i> LVS  |                  |                       |                    |                        |                          | 100                      |                      |                       |                      |                           |                           |                       |                  |                    |        |     |     |     |     |
| <i>H. pylori</i> GU2      |                  |                       |                    |                        |                          |                          | 100                  |                       |                      |                           |                           |                       |                  |                    |        |     |     |     |     |
| <i>M. catarrhalis</i>     |                  |                       |                    |                        |                          |                          |                      | 100                   |                      |                           |                           |                       |                  |                    |        |     |     |     |     |
| <i>P. aeruginosa</i>      |                  |                       |                    |                        |                          |                          |                      |                       | 100                  |                           |                           |                       |                  |                    |        |     |     |     |     |
| <i>S. meliloti</i> Rm1021 |                  |                       |                    |                        |                          |                          |                      |                       |                      | 100                       |                           |                       |                  |                    |        |     |     |     |     |
| <i>S. minnesota</i> Re595 |                  |                       |                    |                        |                          |                          |                      |                       |                      |                           | 100                       |                       |                  |                    |        |     |     |     |     |
| <i>S. Typhimurium</i>     |                  |                       |                    |                        |                          |                          |                      |                       |                      |                           |                           | 100                   |                  |                    |        |     |     |     |     |
| <i>S. aureus</i>          |                  |                       |                    |                        |                          |                          |                      |                       |                      |                           |                           |                       | 100              |                    |        |     |     |     |     |
| <i>B. subtilis</i>        |                  |                       |                    |                        |                          |                          |                      |                       |                      |                           |                           |                       |                  | 100                |        |     |     |     |     |
| Chitin                    |                  |                       |                    |                        |                          |                          |                      |                       |                      |                           |                           |                       |                  |                    | 100    |     |     |     |     |
| ES                        |                  |                       |                    |                        |                          |                          |                      |                       |                      |                           |                           |                       |                  |                    |        | 100 |     |     |     |
| FH                        |                  |                       |                    |                        |                          |                          |                      |                       |                      |                           |                           |                       |                  |                    |        |     | 100 |     |     |
| HE                        |                  |                       |                    |                        |                          |                          |                      |                       |                      |                           |                           |                       |                  |                    |        |     |     | 100 |     |
| HS                        |                  |                       |                    |                        |                          |                          |                      |                       |                      |                           |                           |                       |                  |                    |        |     |     |     | 100 |

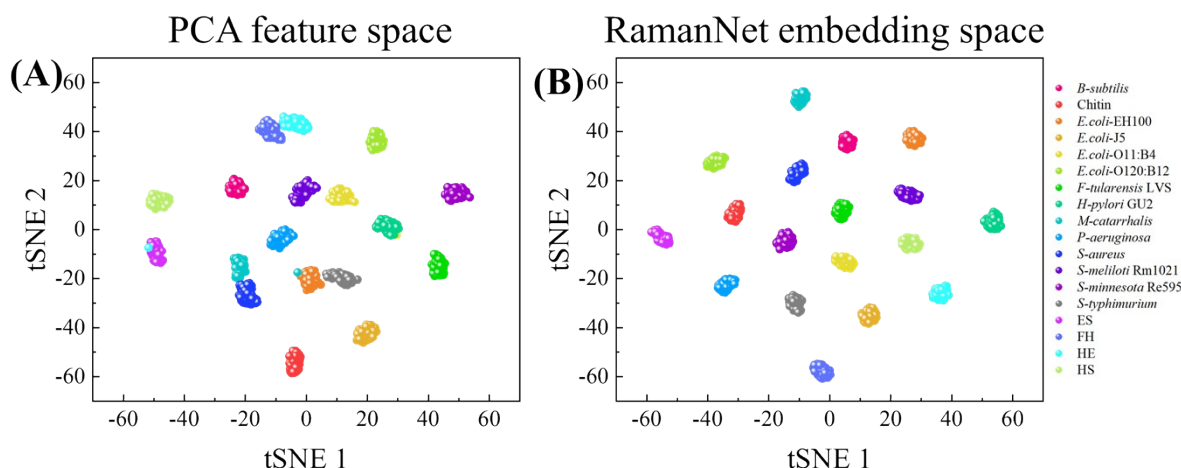

**Fig. S10** The 256-dimensional feature space is projected into a 2 dimensional-map using tSNE based on SERS spectra from single LPS and mixture: (A) PCA feature space, (B) RamanNet embedding space.

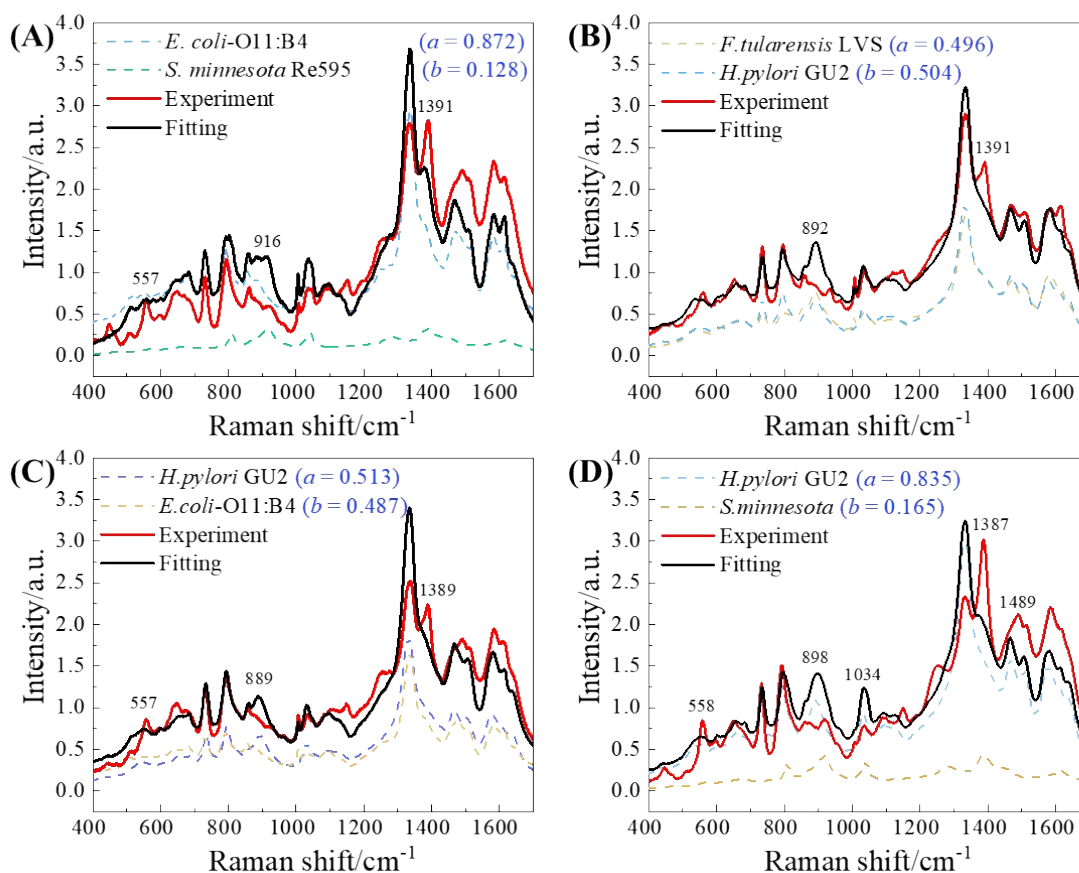

**Fig. S11** Typical average SERS spectra (red curves) of four bacterial endotoxin mixtures and the linear combinations (black curves) of SERS spectra of the corresponding two LPSs: (A) *E. coli*-O11:B4 and *S. minnesota* Re595 (ES), (B) *F. tularensis* LVS and *H. pylori* GU2 (FH), (C) *E. coli*-O11:B4 and *H. pylori* GU2 (EH), and (D) *S. minnesota* Re595 and *H. pylori* GU2 (SH). Dash lines are the SERS contributions from each LPS.

## References:

1. Fleckenstein, J. M.; Matthew Kuhlmann, F.; Sheikh, A., Acute Bacterial Gastroenteritis. *Gastroenterology Clinics of North America* **2021**, *50* (2), 283-304.
2. Cusack, R.; Garduno, A.; Elkholy, K.; Martín-Loeches, I., Novel investigational treatments for ventilator-associated pneumonia and critically ill patients in the intensive care unit. *Expert Opinion on Investigational Drugs* **2022**, *31* (2), 173-192.
3. <https://ahpsr.who.int/publications/i/item/global-action-plan-on-antimicrobial-resistance>.
4. <https://www.who.int/news-room/fact-sheets/detail/antimicrobial-resistance>.
5. Lee, A. S.; de Lencastre, H.; Garau, J.; Kluytmans, J.; Malhotra-Kumar, S.; Peschel, A.; Harbarth, S., Methicillin-resistant *Staphylococcus aureus*. *Nature Reviews Disease Primers* **2018**, *4* (1), 18033.
6. Logan, N. A., Bacillus and relatives in foodborne illness. *Journal of Applied Microbiology* **2012**, *112* (3), 417-429.
7. Hinton, G.; Roweis, S., Stochastic neighbor embedding. In *Proceedings of the 15th International Conference on Neural Information Processing Systems*, MIT Press: 2002; pp 857–864.
8. Osorio-Román, I. O.; Aroca, R. F.; Astudillo, J.; Matsuhira, B.; Vásquez, C.; Pérez, J. M., Characterization of bacteria using its O-antigen with surface-enhanced Raman scattering. *Analyst* **2010**, *135* (8), 1997-2001.
9. Stromberg, L. R.; Mendez, H. M.; Mukundan, H., Detection methods for lipopolysaccharides: past and present. *Escherichia coli-recent advances on physiology, pathogenesis biotechnological applications. InTech* **2017**, 141-168.
10. Wu, X.; Zhao, Y.; Zughair, S. M., Highly Sensitive Detection and Differentiation of Endotoxins Derived from Bacterial Pathogens by Surface-Enhanced Raman Scattering. *Biosensors* **2021**, *11* (7), 234.
11. Mangini, M.; Verde, A.; Boraschi, D.; Pantes, V. F.; Italiani, P.; De Luca, A. C., Interaction of nanoparticles with endotoxin Importance in nanosafety testing and exploitation for endotoxin binding. *Nanotoxicology* **2021**, *15* (4), 558-576.
12. Töpfer, N.; Müller, M. M.; Dahms, M.; Ramoji, A.; Popp, J.; Slevogt, H.; Neugebauer, U., Raman spectroscopy reveals LPS-induced changes of biomolecular composition in monocytic THP-1 cells in a label-free manner. *Integrative Biology* **2019**, *11* (3), 87-98.
13. Alessandro, V.; Maria, M.; Stefano, M.; Diana, B.; Paola, I.; Anna Chiara De, L. In SERS-based nanotoxicology assessment of gold nanoparticles, *Proc. SPIE 11786, Optical Methods for Inspection, Characterization, and Imaging of Biomaterials V*, **2021**, 117861G.
14. Sharif, S.; Singh, M.; Kim, S. J.; Schaefer, J., *Staphylococcus aureus* Peptidoglycan Tertiary Structure from Carbon-13 Spin Diffusion. *Journal of the American Chemical Society* **2009**, *131* (20), 7023-7030.
15. Villéger, R.; Saad, N.; Grenier, K.; Falourd, X.; Foucat, L.; Urdaci, M. C.; Bressollier, P.; Ouk, T.-S., Characterization of lipoteichoic acid structures from three probiotic *Bacillus* strains: involvement of D-alanine in their biological activity. *Antonie van Leeuwenhoek* **2014**, *106* (4), 693-706.
16. Fernando, L. D.; Dickwella Widanage, M. C.; Penfield, J.; Lipton, A. S.; Washton, N.; Latgé, J.-P.; Wang, P.; Zhang, L.; Wang, T., Structural Polymorphism of Chitin and Chitosan in Fungal Cell Walls From Solid-State NMR and Principal Component Analysis. *Frontiers in*

*Molecular Biosciences* **2021**, *8*, <https://doi.org/10.3389/fmolb.2021.727053>.

17. Nowicka, A. B.; Czaplicka, M.; Kowalska, A. A.; Szymborski, T.; Kamińska, A., Flexible PET/ITO/Ag SERS Platform for Label-Free Detection of Pesticides. *Biosensors* **2019**, *9* (3), 111.
18. Caroff, M.; Novikov, A., Lipopolysaccharides: structure, function and bacterial identifications. *OCL* **2020**, *27*, 31.
19. Xiao, X.; Sankaranarayanan, K.; Khosla, C., Biosynthesis and structure–activity relationships of the lipid a family of glycolipids. *Current Opinion in Chemical Biology* **2017**, *40*, 127-137.
20. Okan, N. A.; Kasper, D. L., The atypical lipopolysaccharide of Francisella. *Carbohydrate Research* **2013**, *378*, 79-83.
21. Li, H.; Liao, T.; Debowski, A. W.; Tang, H.; Nilsson, H.-O.; Stubbs, K. A.; Marshall, B. J.; Benghezal, M., Lipopolysaccharide Structure and Biosynthesis in Helicobacter pylori. *Helicobacter* **2016**, *21* (6), 445-461.
22. Janusch, H.; Brecker, L.; Lindner, B.; Alexander, C.; Gronow, S.; Heine, H.; Ulmer, A. J.; Rietschel, E. T.; Zähringer, U., Structural and biological characterization of highly purified hepta-acyl lipid A present in the lipopolysaccharide of the Salmonella enterica sv. Minnesota Re deep rough mutant strain R595. *Journal of Endotoxin Research* **2002**, *8* (5), 343-356.
